# Supplementary material for: New Ni(ii) 1,2-bis(diphenylphosphino)ethane dithiolates: crystallographic, computational and Hirshfeld surface analyses
Source: Royal Society of Chemistry journal article supplement (doi:10.1039/c5ce01526j), 2015-01-01
Supplement: c5ce01526j1.pdf [file c5ce01526j1.pdf]

## SUPPLEMENTARY INFORMATIONS

### **New Ni(II) 1,2-bis(diphenylphosphino)ethane dithiolates: Crystallographic, computational and Hirshfeld surface analyses**

Reena Yadav,<sup>a</sup> Manoj Trivedi,<sup>b</sup> Gabriele Kociok-Köhn,<sup>c</sup> Rajendra Prasad<sup>d</sup> and Abhinav Kumar<sup>a\*</sup>

---

*a. Department of Chemistry, University of Lucknow, Lucknow 226 007, India.*

*b. Department of Chemistry, University of Delhi, Delhi 110 007, India.*

*c. Department of Chemistry, University of Bath, Bath BA2 7AY, UK.*

*d. Department of Chemistry, S. G. B. University, Amrawati, Maharashtra, India.*

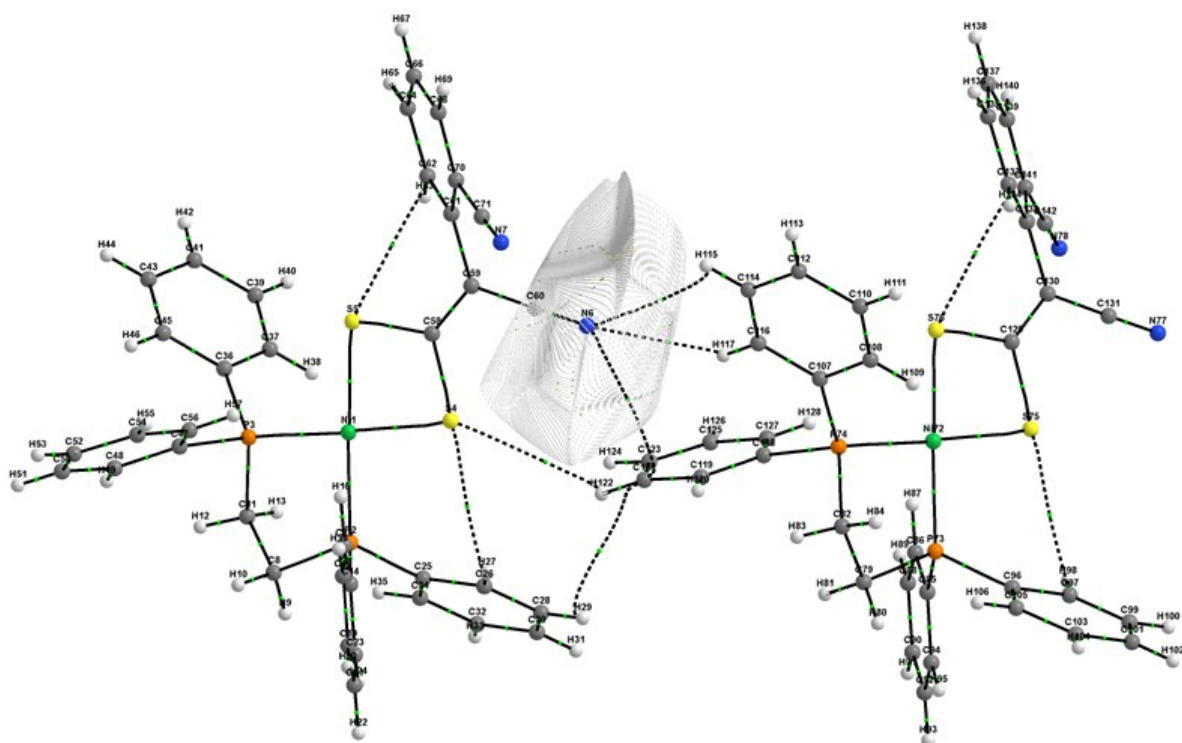

Fig. S1 Molecular graphs for **2** displaying intermolecular (a) C≡N...H interaction along with the interatomic surface of interest.

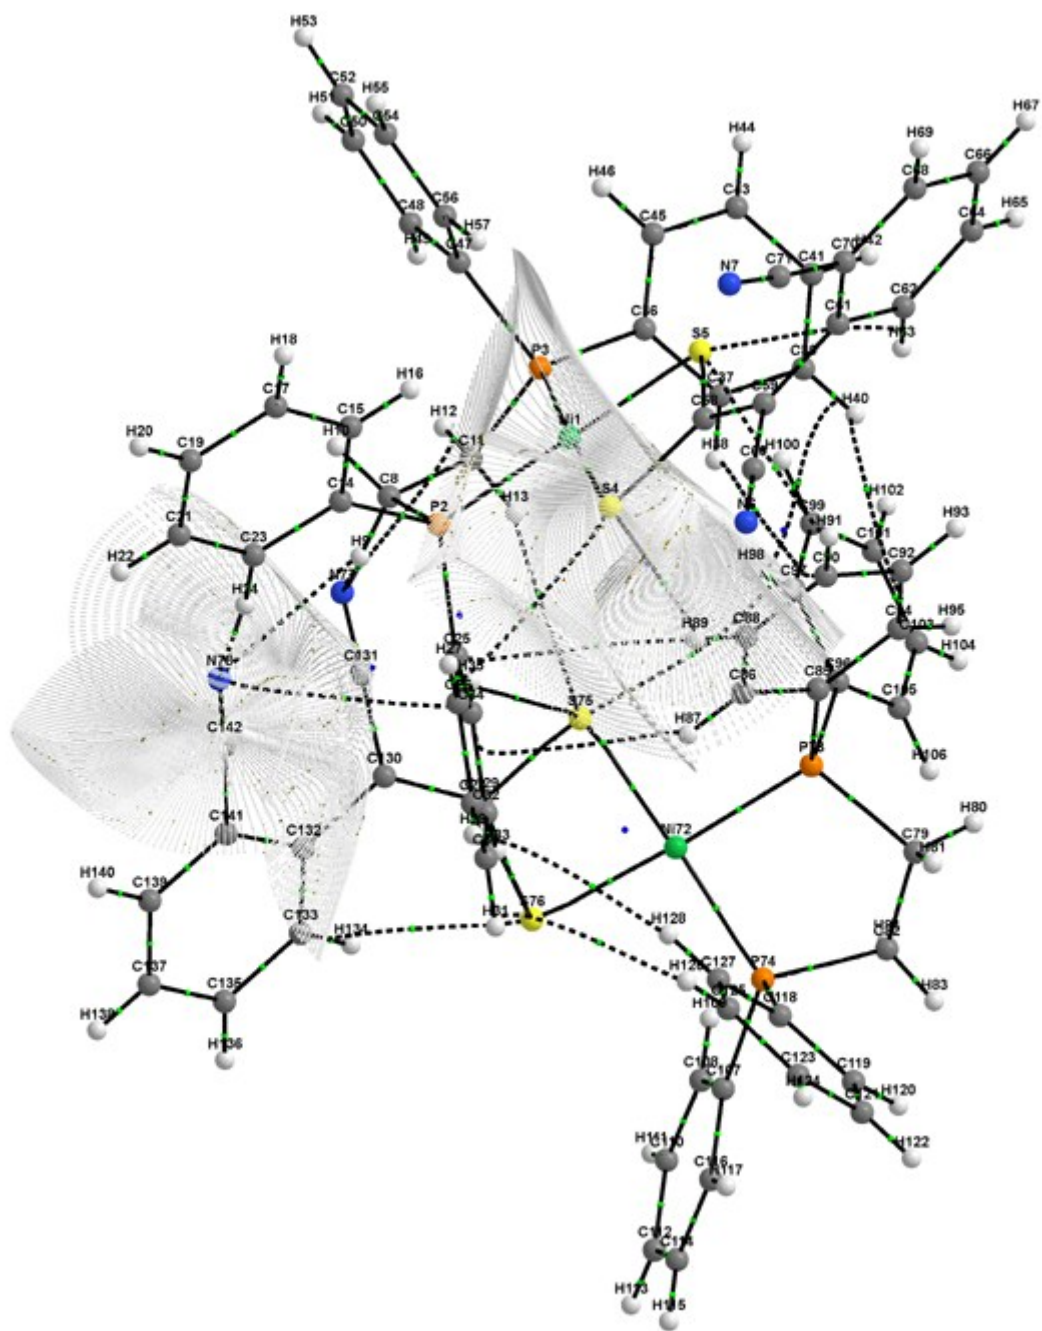

Fig. S2 Molecular graphs for **2** displaying intermolecular C-S...H, C≡N...H interaction alongwith the interatomic surface of interest.

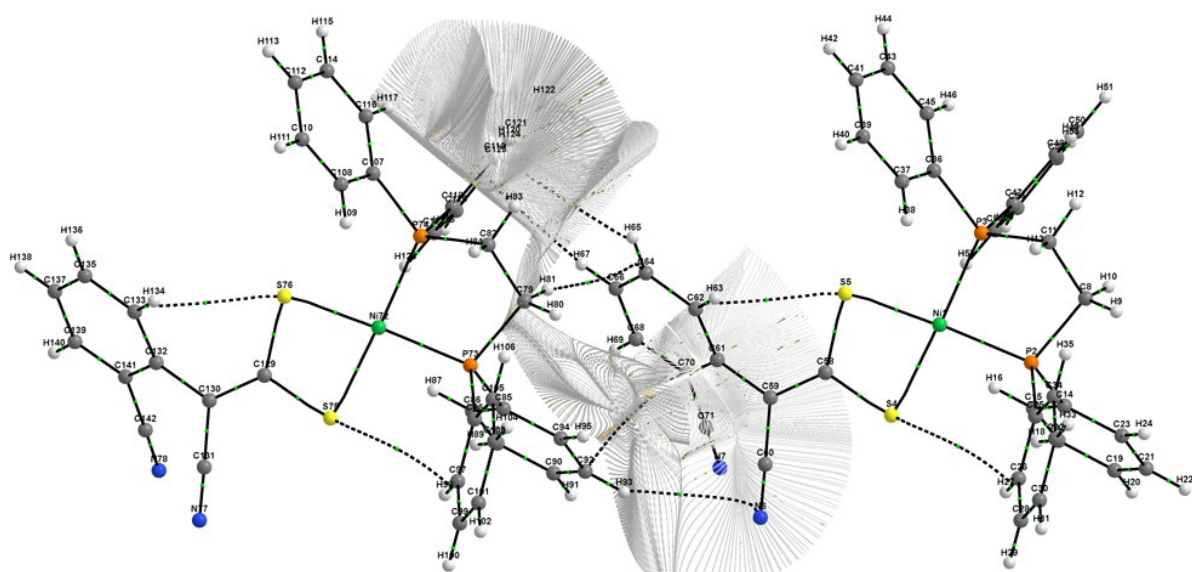

Fig. S3 Molecular graphs for **2** displaying intermolecular  $\pi \cdots \pi$  and C-H $\cdots \pi$  interactions along with the interatomic surface of interest.

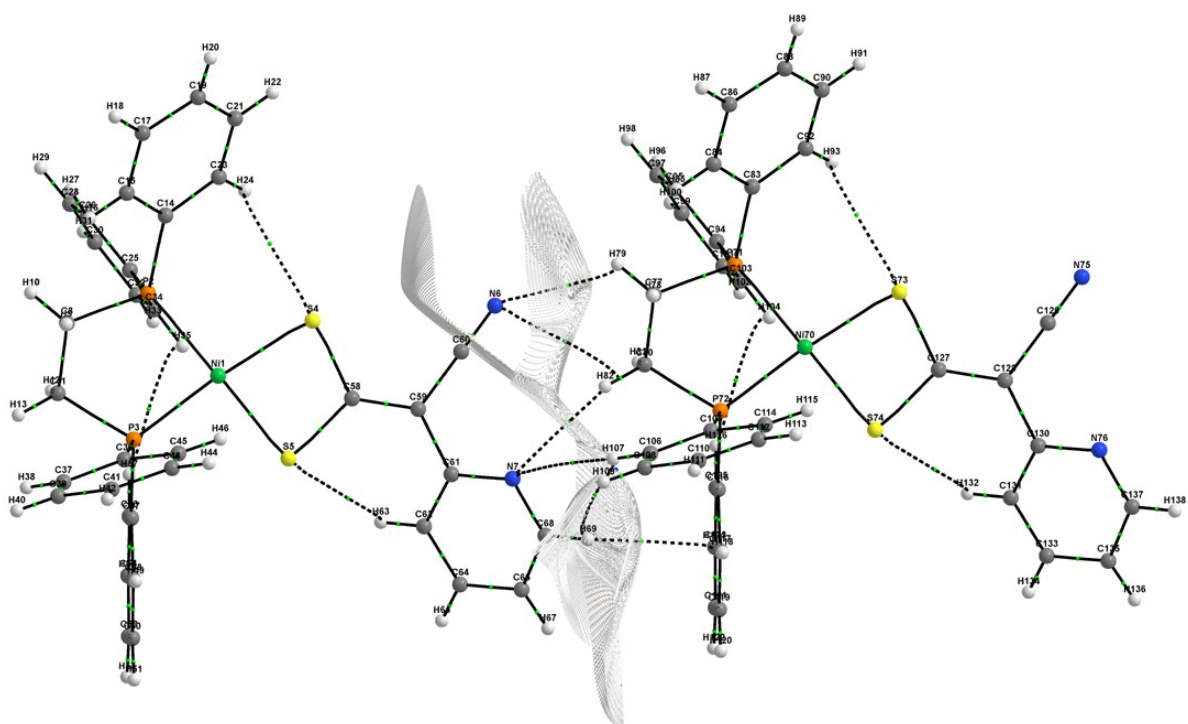

Fig. S4 Molecular graphs for **3** displaying intermolecular C $\equiv$ N $\cdots$ H; (py)N $\cdots$ H; C-H $\cdots \pi$  interactions along with the interatomic surface of interest.

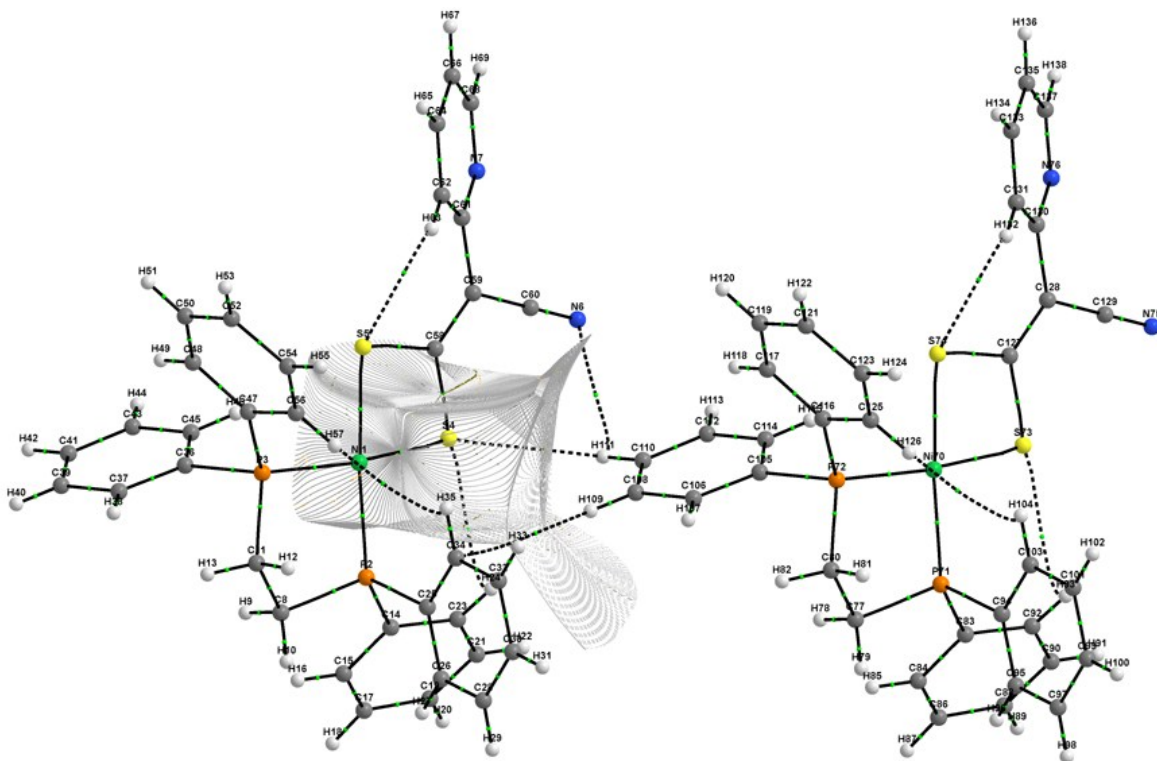

Fig. S5 Molecular graphs for **3** displaying intermolecular C-S...H interaction alongwith the interatomic surface of interest.
